# Supplementary material for: Rapid, efficient and activation-neutral gene editing of polyclonal primary human resting CD4+ T cells allows complex functional analyses
Source: PubMed Central journal article supplement (PMC8748193; doi:10.1038/s41592-021-01328-8), 2021-12-23
Supplement: 41592_2021_1328_MOESM1_ESM.pdf [file 41592_2021_1328_MOESM1_ESM.pdf]

---

**Supplementary information**

---

**Rapid, efficient and activation-neutral gene editing of polyclonal primary human resting CD4<sup>+</sup> T cells allows complex functional analyses**

---

In the format provided by the authors and unedited

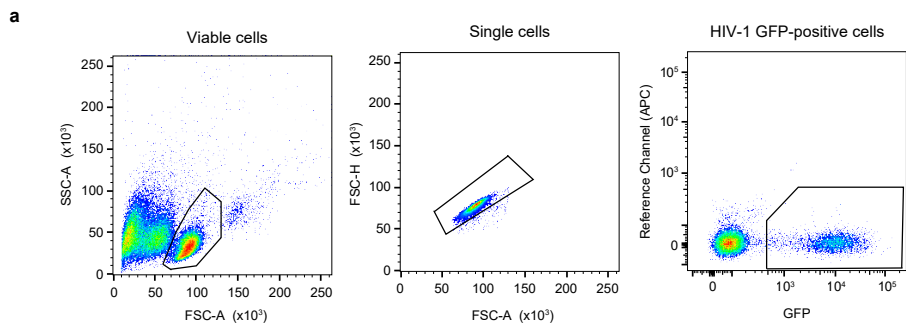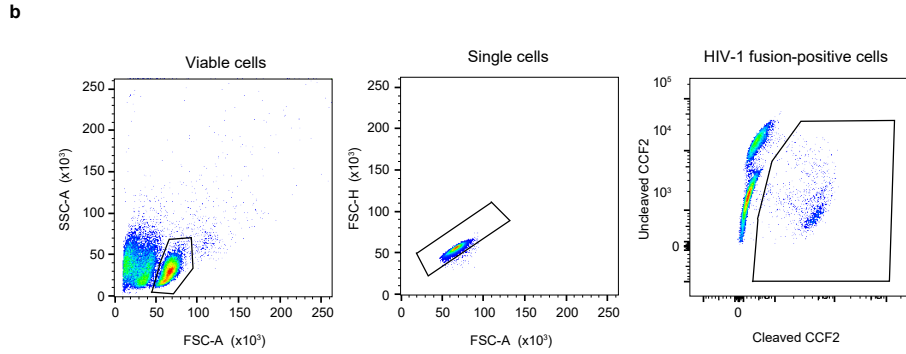

Supplementary Fig. 1

a

CPSF6

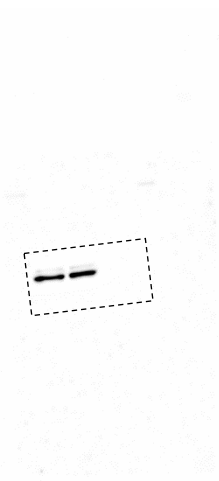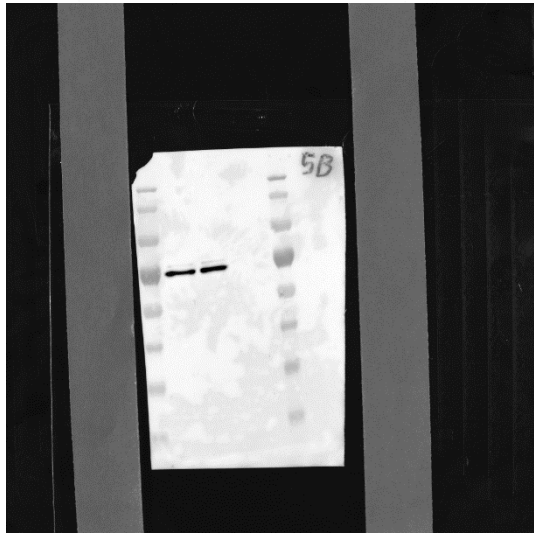

b

TRIM5 $\alpha$

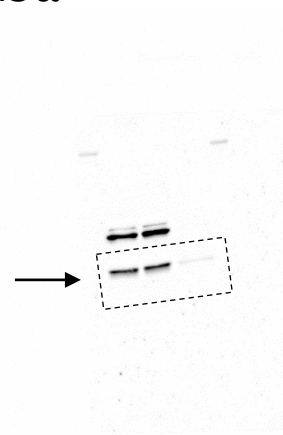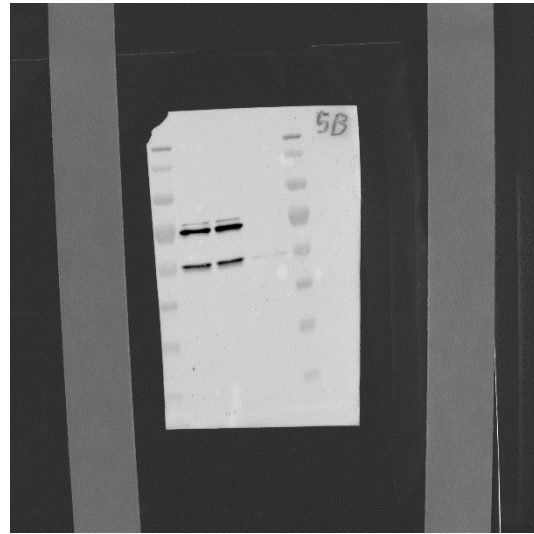

c

Vinculin

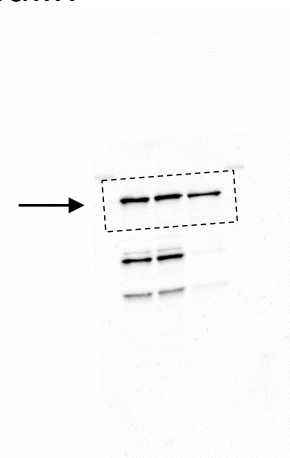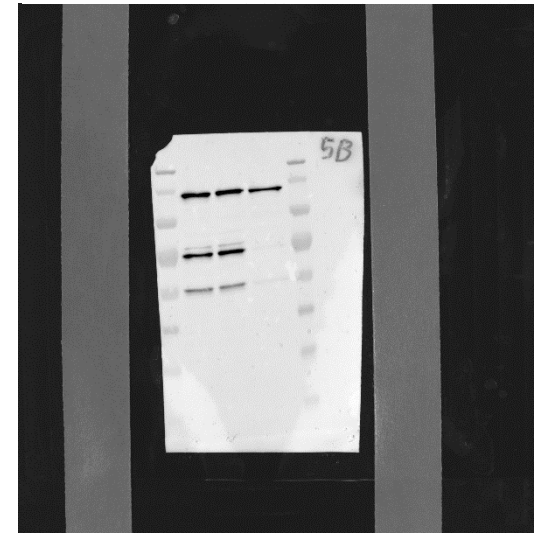

a

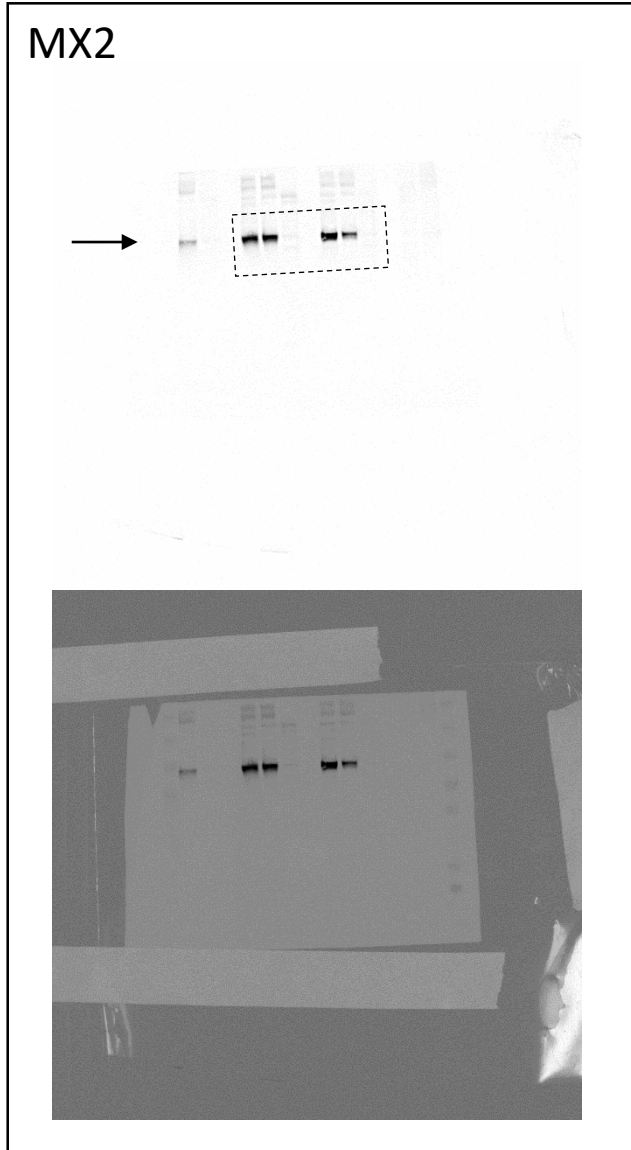

b

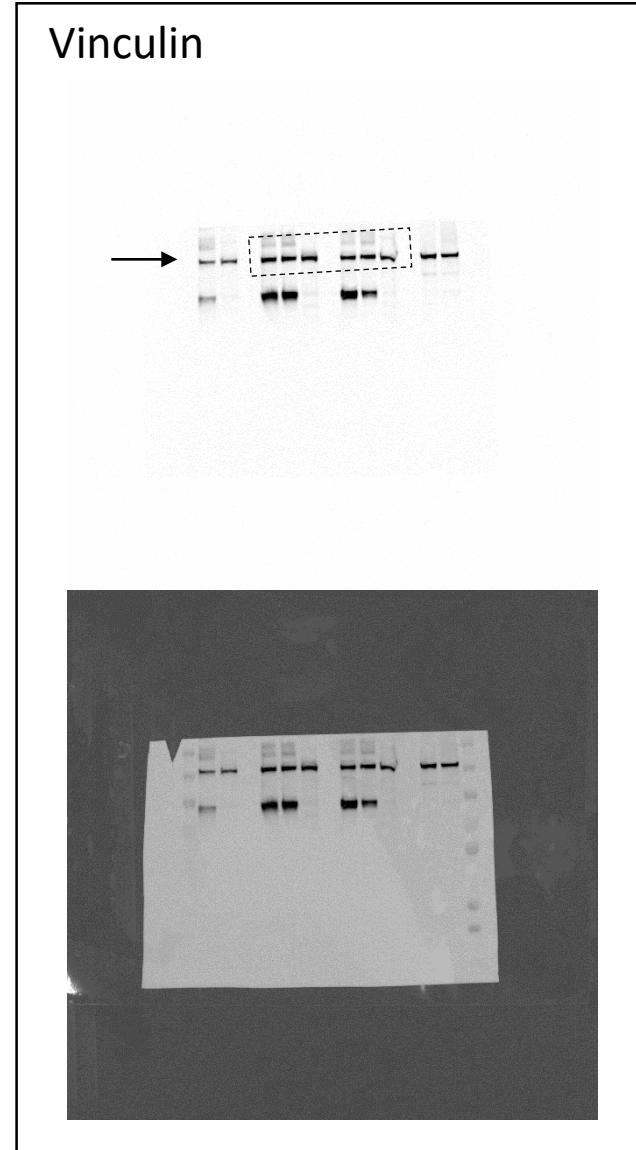

Supplementary Fig. 3

a

CPSF6

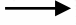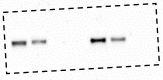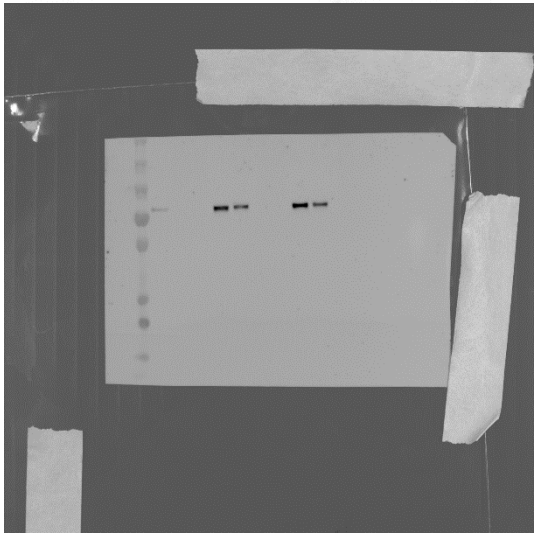

b

Vinculin

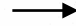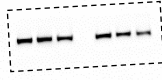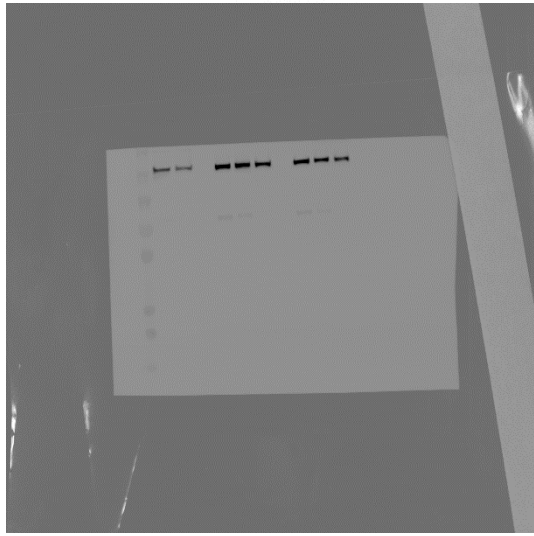

Supplementary Fig. 4

**a**

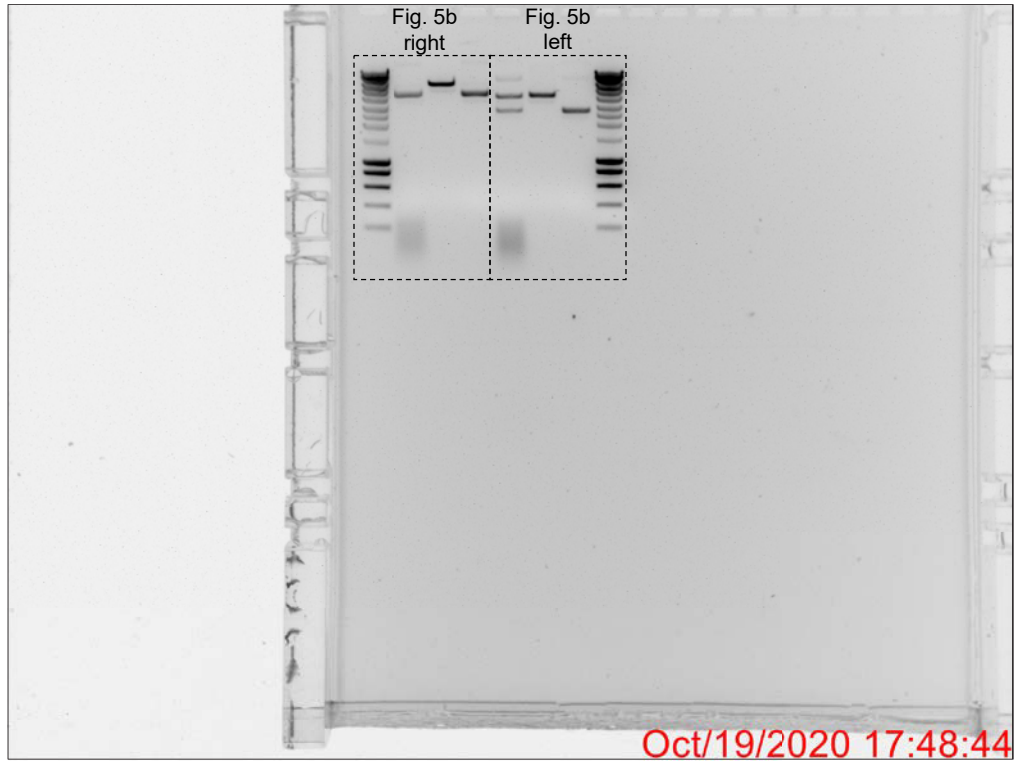

Supplementary Fig. 5

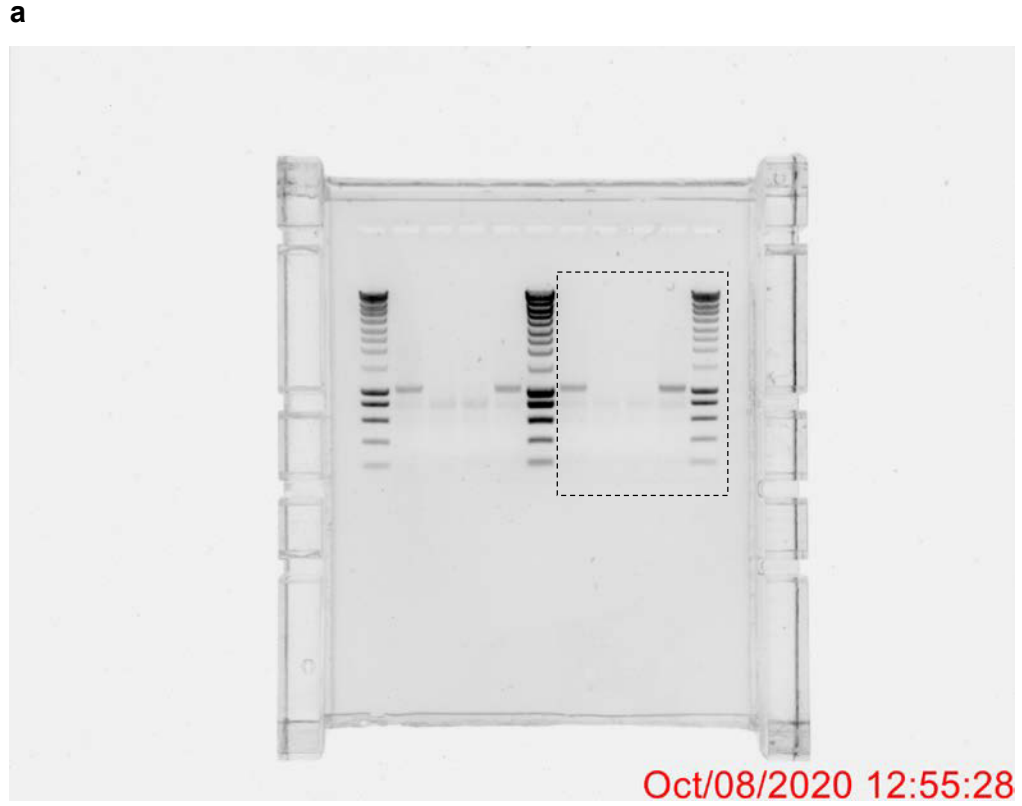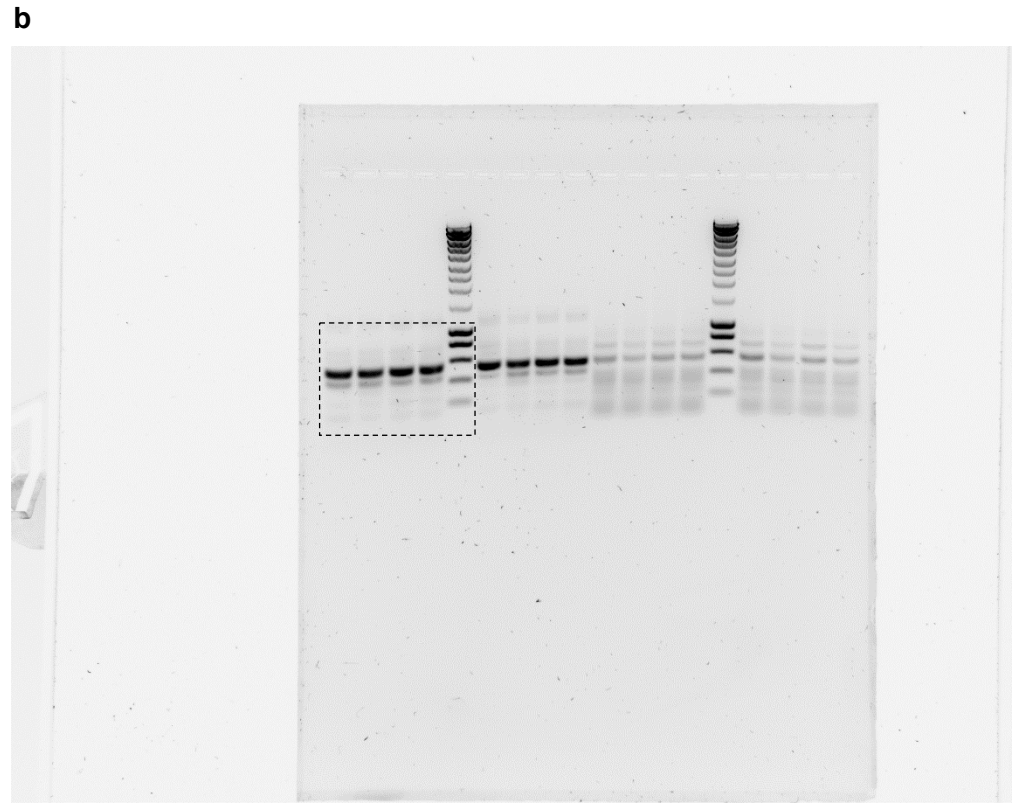

Supplementary Fig. 6

a

SAMHD1

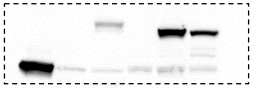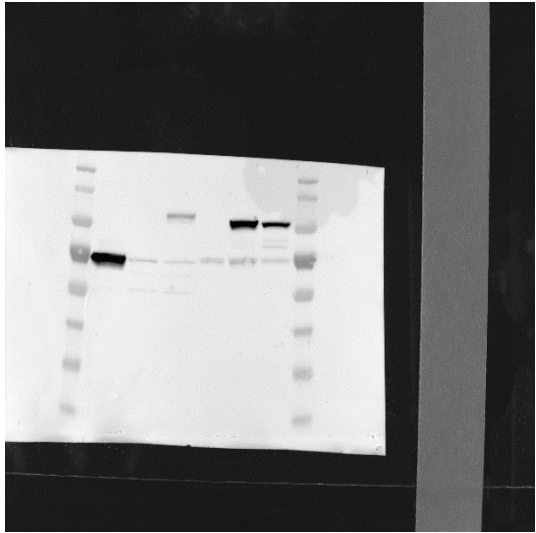

b

GFP

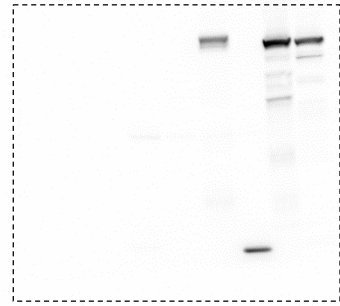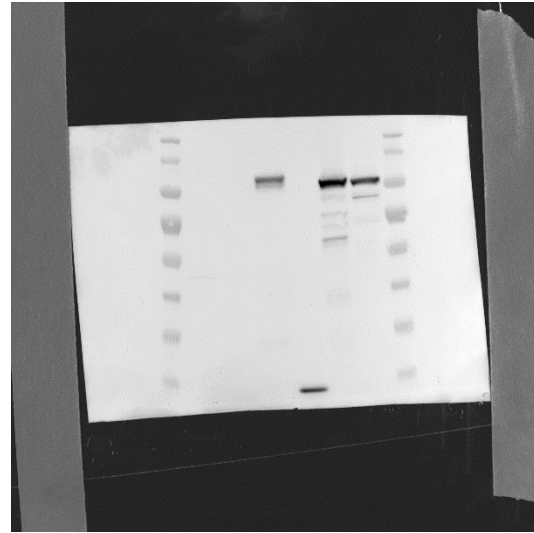

c

Vinculin

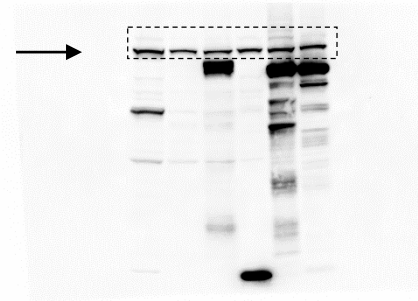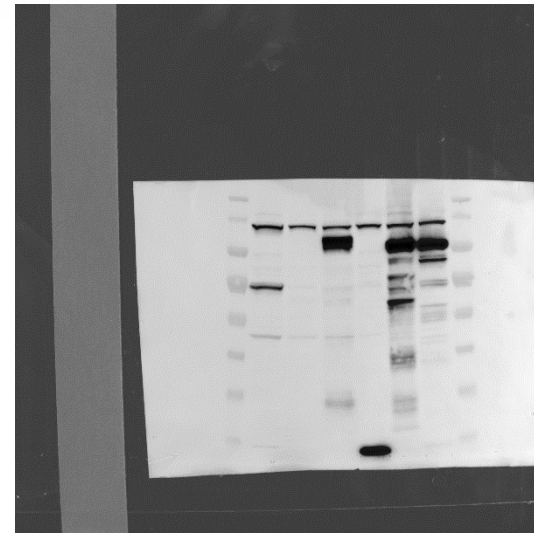

Supplementary Fig. 7



a

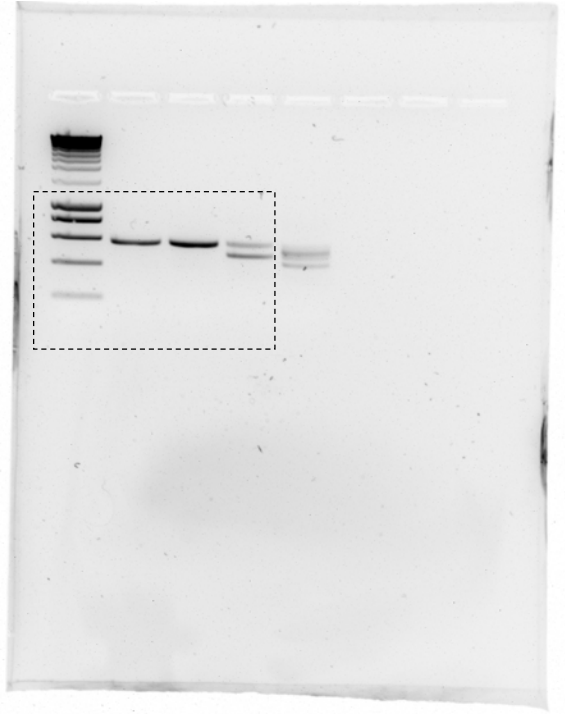

Supplementary Fig. 8

**a**

SAMHD1

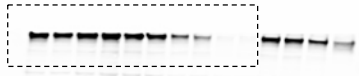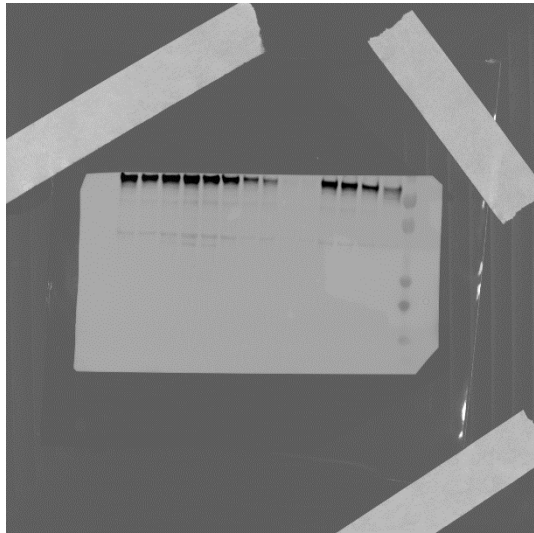

**b**

Vinculin

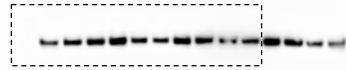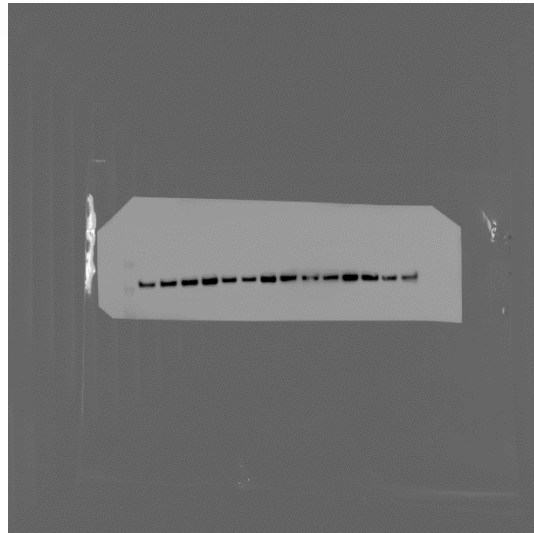

Supplementary Fig. 9

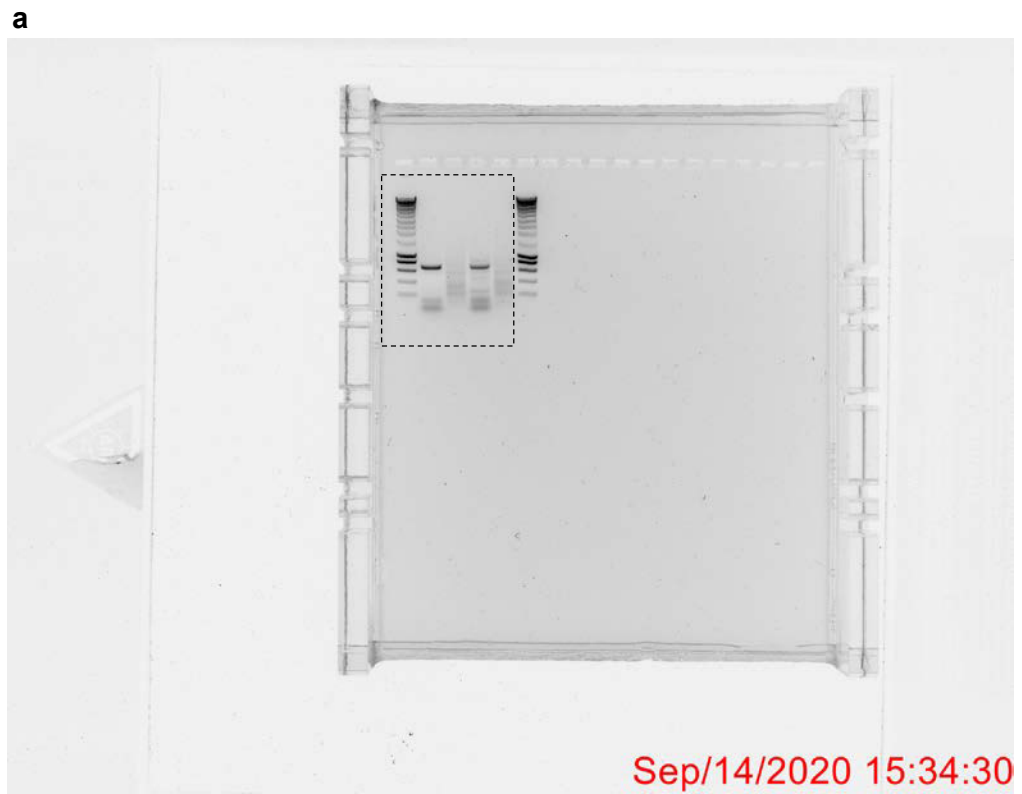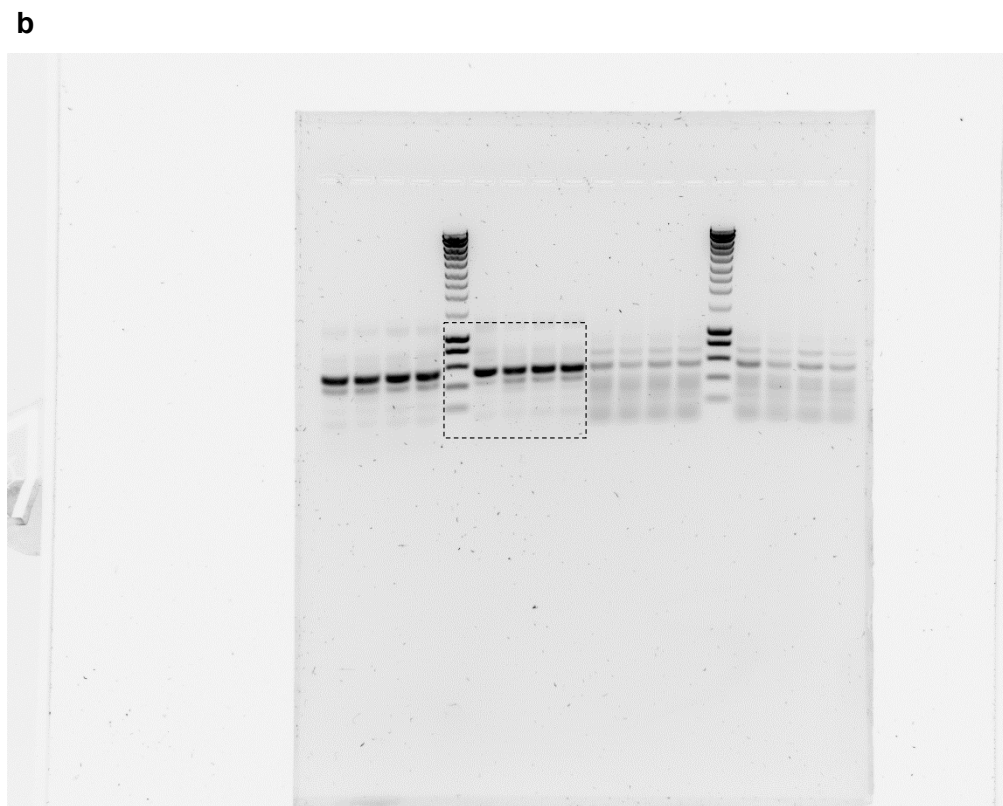

Supplementary Fig. 10

a

SAMHD1

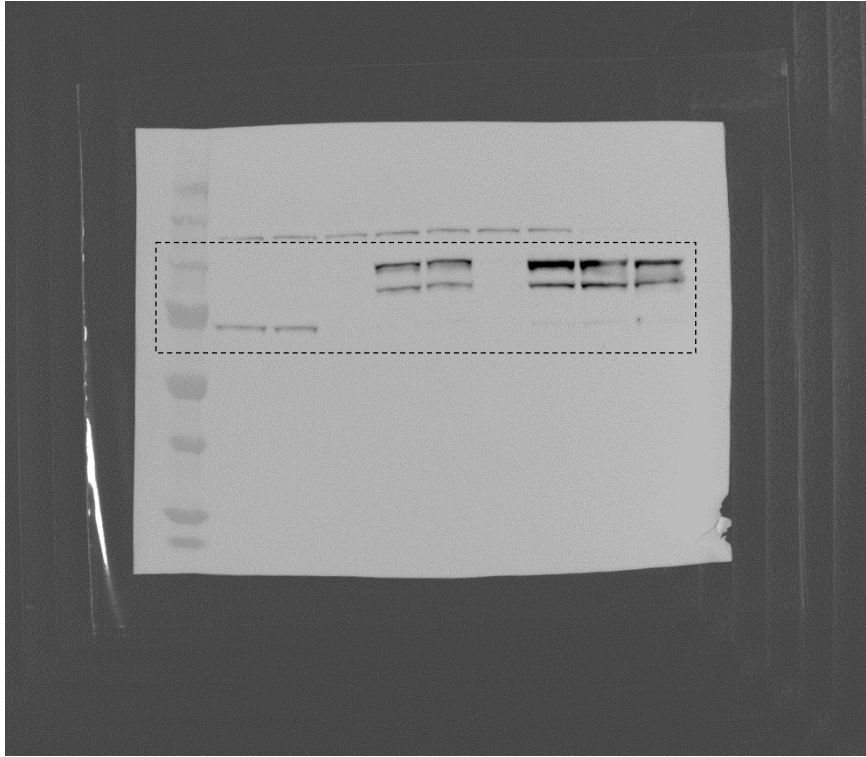

b

Vinculin

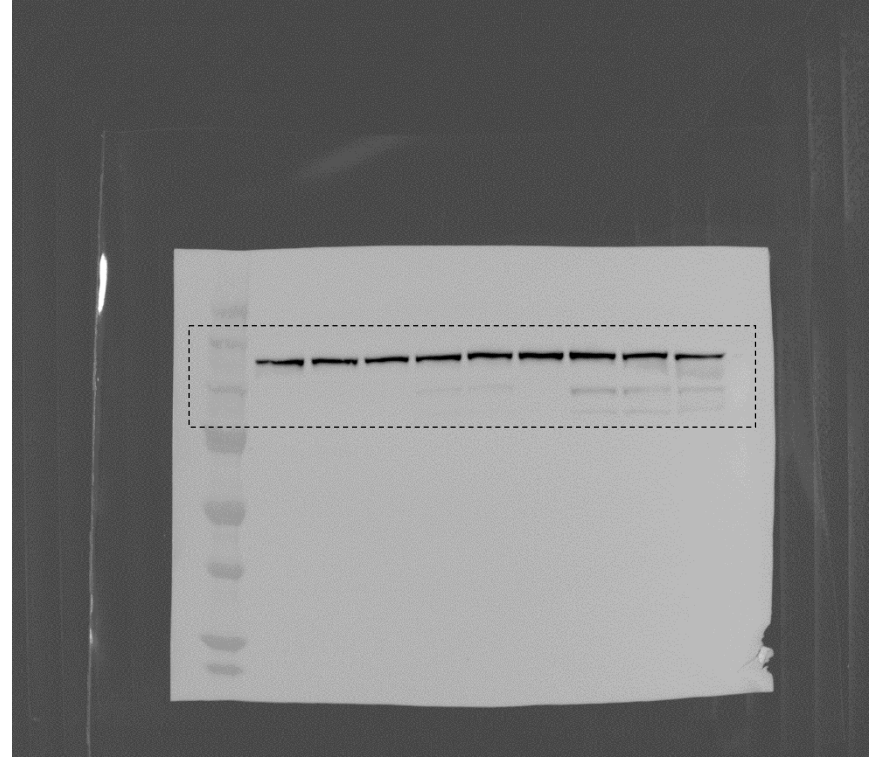

Supplementary Fig. 11
